# Supplementary material
Source: publisher figshare collection journal article supplement (https://acs.figshare.com/ndownloader/files/3921679)
Supplement: Supplementary file 1 [file 3921679]

## **Towards A Sustainable and Near Ambient DeNO<sub>x</sub> Under Lean Burn Conditions: A Revisit to NO Reduction on Virgin and Modified Pd(111) Surfaces**

*Kanak Roy,<sup>#</sup> Ruchi Jain,<sup>#</sup> Chinnakonda S. Gopinath<sup>\*,#</sup>*

<sup>#</sup>Catalysis Division, National Chemical Laboratory, Dr. Homi Bhabha Road, Pune 411 008, India.

<sup>\*</sup>Center of Excellence on Surface Science, National Chemical Laboratory, Dr. Homi Bhabha Road, Pune 411 008, India

Email: [cs.gopinath@ncl.res.in](mailto:cs.gopinath@ncl.res.in)

### Supporting Information (SI)

#### SI-1 – MBI Experimental Setup

All kinetic and TPD experiments reported in this manuscript were performed using an extension of the so-called King and Wells collimated beam method. The home-built molecular beam instrument (MBI) used consists a 12 L capacity stainless steel ultra high vacuum (UHV) chamber evacuated with a 210 L/s turbo-molecular drag pump (Pfeiffer, TMU261) to a base pressure of about  $3 \times 10^{-10}$  Torr. The MBI is equipped with a molecular beam doser setup (Figure S1), a quadrupole mass spectrometer (Pfeiffer, Prisma QMS 200 M3), a sputter ion gun (AG5000, VG Scientific), and sample preparation facilities. The mass spectrometer is kept out of the line-of-sight of the sample to avoid any angular desorption effects. The molecular beam doser consists of a 10 mm disc multi-channel array made up of micro-capillary glass tubes of 1mm in length and 10  $\mu$ m in diameter each (Collimated Holes Inc, USA). The gas-flux in the molecular beam is determined and controlled by the precision leak-valve opening and the backing gas pressure in the gas-manifold. A laterally movable stainless steel shutter, which is manually operated, was placed between the micro-capillary doser and the Pd(111) crystal in order to interrupt the beam when desired (Figure S1). The Pd single crystal (8 mm dia. and 1 mm thick, from Metal crystals and Oxides Ltd., Cambridge) was cut in the (111) direction and polished using standard procedures. It was mounted by spot-welding a 0.5 mm thick tantalum wire on the periphery of the crystal and connected to a pair of copper rods, which in turn were connected to a power-thermocouple feed-through. A K-type thermocouple was welded on the backside of the crystal and to the thermocouple leads of the feed-through. The above feed-through is connected to liquid nitrogen reservoir. The crystal can be cooled to about 100 K with liquid nitrogen or resistively heated to 1373 K. For the present experiments, the distance between the crystal and the beam doser is set to 5 mm. 45 % of the molecular beam is intercepted at a distance of 5 mm between the molecular beam doser and Pd(111) surface under the experimental conditions reported. Due to high flux conditions on the sample surface, re-adsorption of gas molecules from the gas-phase (after adsorption from direct molecular beam) is small and well within the experimental error limit of 5 %.

## Molecular Beam Generation

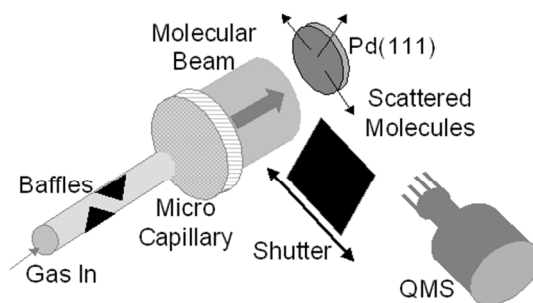

**Figure S1.** Schematic representation of molecular beam generation.

## SI-2

Highlights of the results are as follows: (a) First and foremost is the demonstration of NO dissociation at lower temperatures under net oxidizing conditions, at least up to 325 K, against 450 K for the same on virgin Pd(111) surfaces. Md-Pd(111) shows high rate of  $N_2$  production than virgin Pd(111) surfaces at any given temperatures between 325 and 700 K. (b) Sustainability of  $NO + H_2 + O_2$  reaction on Md-Pd(111) surfaces is evident from the formation of reduced ( $N_2$ ) and oxidized ( $H_2O$ ) products at lower temperatures, indicating the Md-Pd(111) surfaces are not prone to poisoning. (c) Although SS rate of  $N_2$  production decreases gradually at lower temperatures, increasingly selective  $N_2$  formation is observed on Md-Pd(111) surfaces. The above observation validates NO dissociation closer to room temperatures, without any  $NH_3$  formation and in the presence of excess oxygen ( $z = 3$ ). NO molecules compete strongly with oxygen for adsorption sites and the surface may be dominated by  $NO + H_2$  reaction. (d) 1:1:1, 1:1:2 and 1:1:3 reactants exhibit  $N_2$  production up to 375, 350 and 325 K, respectively though NO-content decreases with increasing  $O_2$ -content in the compositions. (e)  $NH_3$  production shows an intricate trend. Oxygen rich composition shows the maximum  $NH_3$  at temperatures  $>425$  K; however, 1:1:2 shows a minimum amount of  $NH_3$  production. Pd(111) and Md-Pd(111) surfaces shows a similar trend in  $NH_3$  production, except for a shift to lower temperatures with the latter.  $N_2O$  production shows similar trend as that of  $N_2$ .

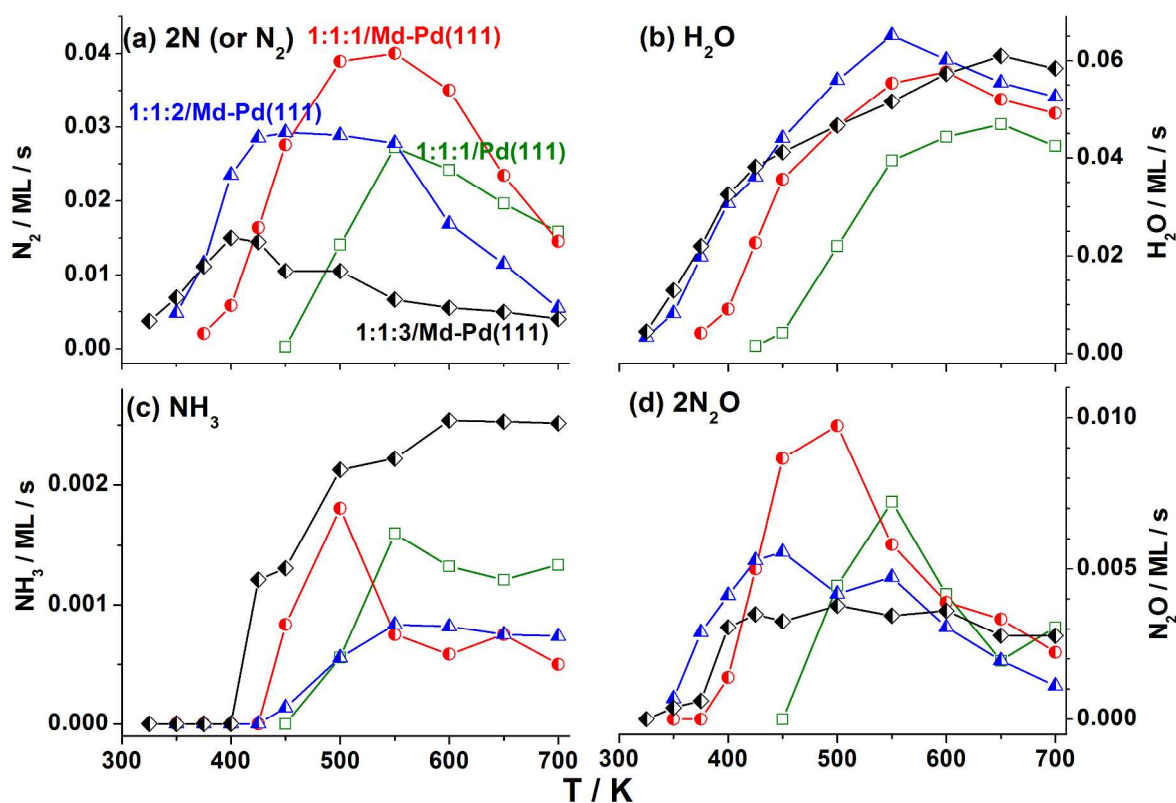

**Figure S2:** Steady state rate measured from  $NO + H_2 + O_2$  reaction on Md-Pd(111) surfaces carried out with 1:1:z ( $z = 1-3$ ) compositions between 325 and 700 K for the products (a)  $N_2$ , (b)  $H_2O$ , (c)  $NH_3$ , and (d)  $N_2O$ . Steady state rate measured on virgin Pd(111) surface with

1:1:1 composition is given for reference. Rate values higher (lower) than 0.005 ML/s was reproduced within 5% (20%) error limit.
